# Supplementary material
Source: Elsevier journal article supplement (https://www.sciencedirect.com/science/article/pii/S030089321730324X)
Supplement: mmc1 [file S030089321730324X:mmc1.pdf]

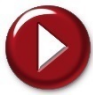

## **Material suplementario**

---

# **Niveles de complejidad asistencial en pacientes con códigos diagnósticos de insuficiencia cardiaca en una población**

---

## **Grupos de riesgo clínicos**

Los grupos de riesgo clínicos (CRG) son un sistema de clasificación de pacientes poblacional en la que la unidad de análisis no son el evento, sino el individuo<sup>1,2</sup>. De este modo, se asigna a cada individuo a un único grupo de riesgo mutuamente excluyente que relaciona sus características clínicas y demográficas con la cantidad y el tipo de recursos sanitarios que dicha persona consumirá en un futuro.

Esta asignación se establece con base en todos los contactos que la persona ha tenido con la atención tanto especializada (hospitalaria y ambulatoria) como primaria durante un periodo que habitualmente es de 1 año.

El sistema está basado principalmente en los diagnósticos de la Clasificación Internacional de Enfermedades, 9.<sup>a</sup> revisión-Modificación Clínica (CIE-9-MC), aunque los procedimientos también intervienen en el algoritmo. Cada CRG presenta varios niveles de gravedad de la enfermedad (que pueden ir desde el nivel 0 hasta el 6) y un peso, como expresión del consumo de recursos esperado para ese paciente en el siguiente periodo de análisis<sup>1</sup>.

## **Desglose de los estados de salud según los grupos de riesgo clínicos**

Es el mayor nivel de consolidación y permite clasificar una población en 9 niveles de salud. Cada uno de estos niveles de salud tiene un número variable de niveles de gravedad que generan un total de 44 grupos:

1. Estado de salud sano. Incluye grupos específicos para la población sana, población sana no usuaria, embarazo, parto, etc.
2. Historia de enfermedad aguda significativa.
3. Enfermedad crónica menor única.
4. Enfermedad crónica menor en múltiples sistemas orgánicos.
5. Enfermedad dominante única o moderada crónica.
6. Enfermedad crónica significativa en múltiples sistemas orgánicos.
7. Enfermedad crónica dominante en 3 o más sistemas orgánicos.
8. Neoplasias dominantes, metastásicas y complicadas.
9. Condiciones catastróficas.

## BIBLIOGRAFÍA

1. Averill RF, Goldfield N, Eisenhandler J, et al. Development and evaluation of clinical risk groups (CRGs). 3M HIS Research Report 9-99. Wallingford: 3M Health Information Systems; 1999.
2. Albarracín Serra A. La producción sanitaria: codificación de enfermedades y procedimientos. Tema 8.1. Madrid: Escuela Nacional de Sanidad; 2012 [citado 27 Abr 2017]. Disponible en: [http://e-spacio.uned.es/fez/eserv/bibliuned:500676/n8.1\\_La\\_producci\\_\\_n\\_sanitaria.pdf](http://e-spacio.uned.es/fez/eserv/bibliuned:500676/n8.1_La_producci__n_sanitaria.pdf).
